# Supplementary material
Source: PubMed Central journal article supplement (PMC2262980)
Supplement: mbc_E07-09-0893_1.pdf [file mbc_E07-09-0893_1.pdf]

**E07-09-0893 Arai**

**Supplementary Figure S1.** Positional selectivity of MBOA-7. 40  $\mu\text{M}$  of *sn*-1-lyso-2-acyl-lysoPI (see Materials & Methods) and 12.5  $\mu\text{M}$  [ $^{14}\text{C}$ ]arachidonoyl-CoA were used as an acyl acceptor and an acyl donor, respectively. After the *in vitro* acyltransferase assay, the lipids were extracted and separated by TLC as described in Materials & Methods. Significant radiolabeled PI was formed after the incubation with the microsomes of wild-type and *mboa-7* mutants (black plus gray bar). The resulting PI fractions were re-extracted from the TLC plates, treated with phospholipase  $\text{A}_2$ , and separated by TLC. Radiolabeled free fatty acid and lysoPI produced by the phospholipase  $\text{A}_2$  treatment were indicated as gray bars and black bars, respectively.

**Supplementary Figure S2.** ESI-MS/MS analysis of PI. (A) Negative ionization ESI-MS/MS spectra of PI molecular species of wild-type (upper) and *mboa-7* mutants (lower). PI molecular species were detected by diagnostic precursor scan of the dehydrated inositol phosphate fragment ion ( $m/z = -241$ ). (B) Relative abundance of PI molecular species. Data are expressed as the percentage of intensity relative to an internal standard (16:0/16:0 PI). “a” refers to alkyl ether linkage.

**Supplementary Figure S3.** Knockdown of a human *mboa-7* homolog reduces incorporation of exogenous AA into PI. (A) Human *mboa-7* (*h-mboa-7*) mRNA was knocked down by siRNA oligonucleotides in HeLa cells as described under “Materials and Methods”. Control siRNA having no significant homology to human gene

sequences (Ambion) was used as a negative control. The reduced expression of *h-mboa-7* was checked 72 h after siRNA transfection by real-time RT-PCR. Each bar represents the mean  $\pm$  SEM of three independent experiments. \*,  $p < 0.05$ . (B) Incorporation of [<sup>14</sup>C]AA into phospholipids of HeLa cells. At 72 h after siRNA transfection, [<sup>14</sup>C]AA was added to the medium, and the cells were incubated for 1 h. The cellular lipids were extracted to analyze the incorporation of radiolabeled fatty acids into phospholipids fractions. Each bar represents the mean  $\pm$  SEM of three independent experiments. \*\*,  $p < 0.01$ . (C) [<sup>14</sup>C]Arachidonoyl-CoA:lysophospholipid acyltransferase activity of the membrane fractions of HeLa cells with different lysophospholipids as acyl acceptors. 12.5  $\mu$ M [<sup>14</sup>C]arachidonoyl-CoA and 40  $\mu$ M each lysophospholipid were used as an acyl donor and acyl acceptor, respectively. Each bar represents the mean  $\pm$  SEM of at least three independent experiments. \*\*,  $p < 0.01$ .



Supplementary figure S2

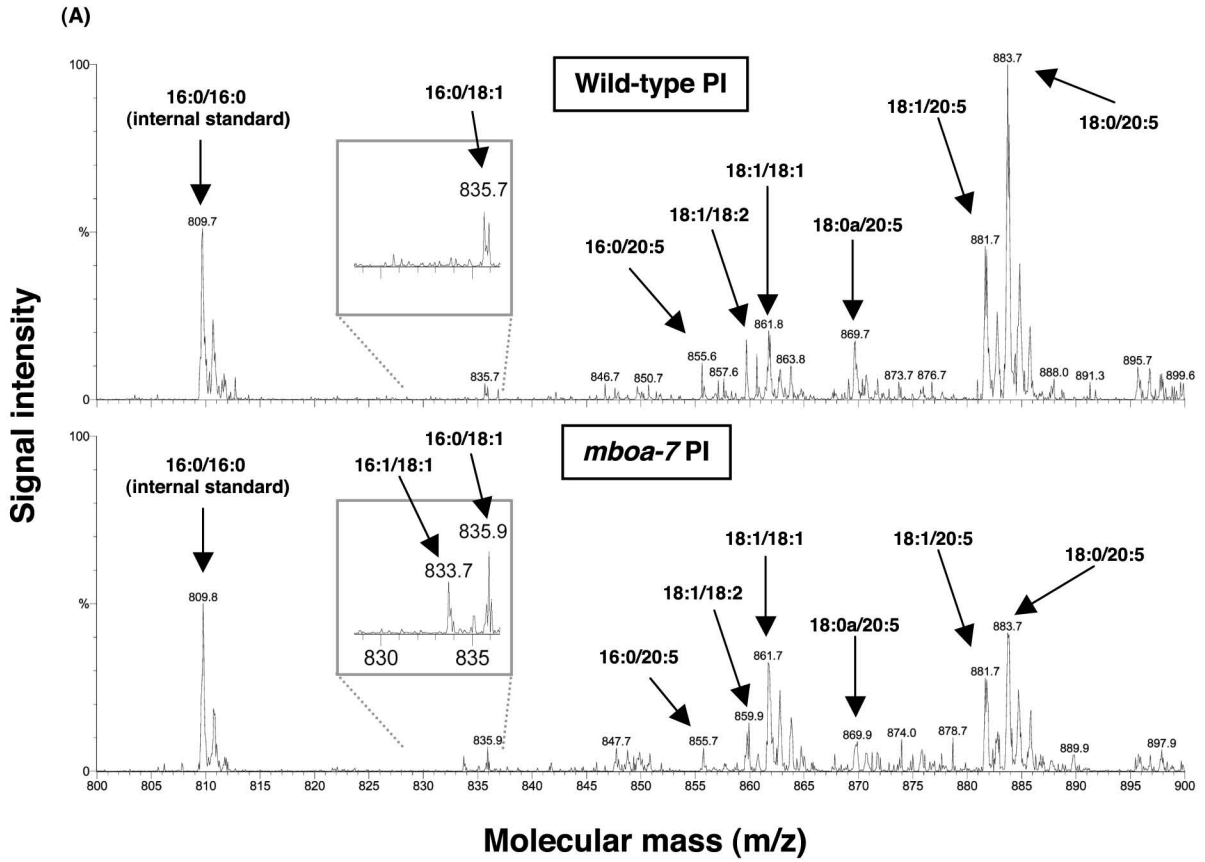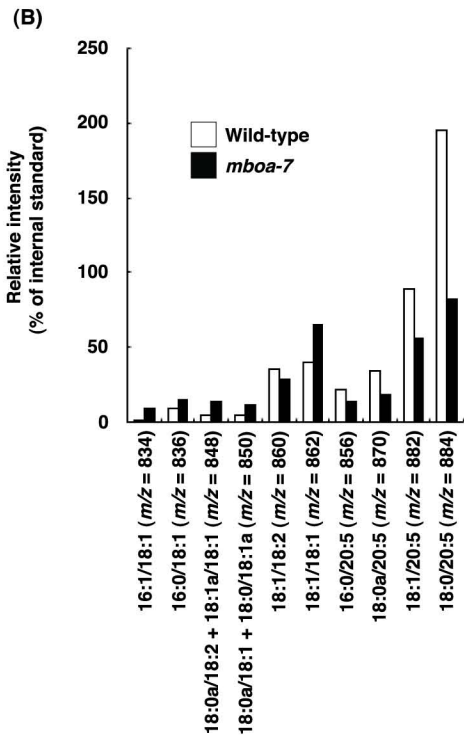

Supplementary figure S3

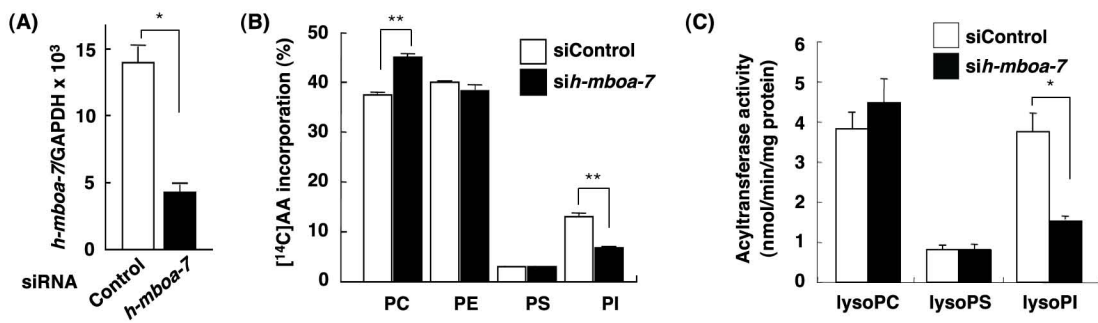

HC. Lee, *et al*
